# Supplementary material
Source: Research Square preprint supplement (doi:10.21203/rs.3.rs-9856824/v1)
Supplement: Supplementary file 1 [file de579a80a8d26eee18348bfd.docx]

**Appendix A. Measurement Items and Factor Loadings**

**Table A1.** Measurement items and standardized factor loadings.

| **Construct** | **Item Code** | **Item Description** | **Loading** |
| --- | --- | --- | --- |
| SCM (SSP) | SSP1 | Quality holds the highest priority in shaping how our firm chooses its suppliers. | 0.812 |
|  | SSP2 | Problems are tackled collaboratively with suppliers on a regular basis within our firm. | 0.789 |
|  | SSP3 | Joint improvement programs are continuously pursued by our firm together with its key suppliers. | 0.776 |
| SCM (CRM) | CRM1 | Our firm maintains frequent contact with customers to define standards of reliability and responsiveness. | 0.848 |
|  | CRM2 | Customer satisfaction levels are tracked and evaluated by our firm on a routine basis. | 0.812 |
|  | CRM3 | The significance of customer relationships is reassessed periodically across our organization. | 0.795 |
| SCM (ILP) | ILP1 | Set-up times are minimized to the fullest extent possible within our operations. | 0.894 |
|  | ILP2 | An ongoing quality-improvement initiative remains firmly embedded within our firm. | 0.876 |
|  | ILP3 | Suppliers are urged by our firm to deliver within shorter lead times. | 0.851 |
| SCM (IS) | IS1 | Proprietary information flows openly between us and our trading partners. | 0.951 |
|  | IS2 | Our trading partners ensure we remain fully aware of developments affecting our business. | 0.928 |
|  | IS3 | Insights regarding essential business processes are exchanged between us and our trading partners. | 0.905 |
| SCM (P) | P1 | Final product assembly is held back by our firm until actual customer orders arrive. | 0.943 |
|  | P2 | Our firm postpones product differentiation until the latest possible stage. | 0.921 |
| ICT (IA) | ICT1 | Information accessed through our ICT systems is accurate. | 0.968 |
|  | ICT2 | Information accessed through our ICT systems is reliable. | 0.942 |
| ICT (REP) | ICT3 | Information is presented in an easy-to-understand format. | 0.734 |
| ICT (CR) | ICT4 | Information accessed is relevant to operational decisions. | 0.838 |
| ICT (ACC) | ICT5 | Information is accessible in real time across supply chain partners. | 0.882 |
| LP (Cost) | LP1 | Our logistics operations achieve low overall cost. | 0.978 |
|  | LP2 | Our logistics costs are lower than industry average. | 0.951 |
| LP (Time) | LP3 | Our firm achieves short order-fulfillment cycle times. | 0.872 |
| LP (Qual) | LP4 | Our firm consistently delivers high-quality logistics service. | 0.946 |
| LP (Flex) | LP5 | Our firm adapts logistics operations quickly to changing customer demand. | 0.918 |
| LP (Inn) | LP6 | Our firm introduces innovative logistics solutions ahead of competitors. | 0.729 |

*Note: All items measured on a 7-point Likert scale (1 = strongly disagree, 7 = strongly agree). SSP = SSP; CRM = CRM; ILP = ILP; IS = Information Sharing; P = Postponement; IA = Intrinsic Accuracy; REP = Representation; CR = Contextual Relevance; ACC = Accessibility.*
